# Supplementary material for: Biological rhythms in COVID-19 vaccine effectiveness in an observational cohort study of 1.5 million patients
Source: JCI journal article supplement (doi:10.1172/jci167339), 2023-04-13
Supplement: sd2 [file 2]

## STROBE REPORTING CHECKLIST FOR OBSERVATIONAL STUDIES

| <u>Strobe Checklist Item</u>                                                                                                                                                                                                                                                                                                                                                                                                   | <u>Manuscript</u>                                                                                                                                                                       |
|--------------------------------------------------------------------------------------------------------------------------------------------------------------------------------------------------------------------------------------------------------------------------------------------------------------------------------------------------------------------------------------------------------------------------------|-----------------------------------------------------------------------------------------------------------------------------------------------------------------------------------------|
| <b>Title and Abstract</b>                                                                                                                                                                                                                                                                                                                                                                                                      |                                                                                                                                                                                         |
| <p>(a) Indicate the study's design with a commonly used term in the title or the abstract</p> <p>(b) Provide in the abstract an informative and balanced summary of what was done and what was found</p>                                                                                                                                                                                                                       | <p>Title "Biological rhythms in COVID-19 vaccine effectiveness in an <u>observational cohort study</u> of 1.5 million patients."</p> <p>Abstract consistent with STROBE guidelines.</p> |
| <b>Results- Participants</b>                                                                                                                                                                                                                                                                                                                                                                                                   |                                                                                                                                                                                         |
| <p>(a) Report numbers of individuals at each stage of study—eg numbers potentially eligible, examined for eligibility, confirmed eligible, included in the study, completing follow-up, and analysed.</p> <p>(b) Give reasons for non-participation at each stage</p> <p>(c) Consider use of a flow diagram.</p>                                                                                                               | <p><b>Fig 1A</b> provides a flow diagram of this information.</p>                                                                                                                       |
| <b>Results- Descriptive Data</b>                                                                                                                                                                                                                                                                                                                                                                                               |                                                                                                                                                                                         |
| <p>(a) Give characteristics of study participants (eg demographic, clinical, social) and information on exposures and potential confounders</p> <p>(b) Indicate number of participants with missing data for each variable of interest</p> <p>(c) Summarise follow-up time (eg, average and total amount)</p>                                                                                                                  | <p><b>Table 1</b> provides this information. There is no missing data for the variables of interest.</p>                                                                                |
| <b>Results- Outcome Data</b>                                                                                                                                                                                                                                                                                                                                                                                                   |                                                                                                                                                                                         |
| <p>Report numbers of outcome events or summary measures over time.</p>                                                                                                                                                                                                                                                                                                                                                         | <p>These data are contained in the main text, <b>Fig. 2</b>, and <b>Supplemental Figs. 1-4</b>.</p>                                                                                     |
| <b>Results- Main Results</b>                                                                                                                                                                                                                                                                                                                                                                                                   |                                                                                                                                                                                         |
| <p>(a) Give unadjusted estimates and, if applicable, confounder-adjusted estimates and their precision (eg, 95% confidence interval). Make clear which confounders were adjusted for and why they were included.</p> <p>(b) Report category boundaries when continuous variables were categorized</p> <p>(c) If relevant, consider translating estimates of relative risk into absolute risk for a meaningful time period.</p> | <p>These data can be found in the main text, <b>Figs. 1-4</b>, and <b>Supplemental Tables 7-9</b>.</p>                                                                                  |

|                                                                                                                                                                            |                                                                                                                |
|----------------------------------------------------------------------------------------------------------------------------------------------------------------------------|----------------------------------------------------------------------------------------------------------------|
| <b>Results- Other Analyses</b>                                                                                                                                             |                                                                                                                |
| Report other analyses done—eg analyses of subgroups and interactions, and sensitivity analyses                                                                             | These can be found in <b>Figs. 3, 4, and Supplemental Figures 6 and 7; Supplemental Tables 3-5, and 11-19.</b> |
| <b>Discussion- Key Results</b>                                                                                                                                             |                                                                                                                |
| Summarise key results with reference to study objectives                                                                                                                   | Included in the Discussion section.                                                                            |
| <b>Discussion- Limitations</b>                                                                                                                                             |                                                                                                                |
| Discuss limitations of the study, taking into account sources of potential bias or imprecision. Discuss both direction and magnitude of any potential bias                 | Included in the Discussion section.                                                                            |
| <b>Discussion- Interpretation</b>                                                                                                                                          |                                                                                                                |
| Give a cautious overall interpretation of results considering objectives, limitations, multiplicity of analyses, results from similar studies, and other relevant evidence | Included in the Discussion section.                                                                            |
| <b>Discussion- Generalizability</b>                                                                                                                                        |                                                                                                                |
| Discuss the generalisability (external validity) of the study results                                                                                                      | Included in the Discussion section.                                                                            |
| <b>Other Information</b>                                                                                                                                                   |                                                                                                                |
| Give the source of funding and the role of the funders for the present study and, if applicable, for the original study on which the present article is based              | Included in the Funding section at the end of the document.                                                    |
